# Supplementary material for: Using machine learning and big data to explore the drug resistance landscape in HIV
Source: PLoS Comput Biol. 2021 Aug 26;17(8):e1008873. doi: 10.1371/journal.pcbi.1008873 (PMC8425536; doi:10.1371/journal.pcbi.1008873)
Supplement: S2 Data — A .csv file containing all the known RAMs used in this project as well as the corresponding feature name in the encoded datasets. Obtained from (hivdb.stanford.edu/dr-summary/comments/NRTI/) and (hivdb.stanford.edu/dr-summary/comments/NNRTI/). (CSV) [file pcbi.1008873.s008.csv]

feature name	Position	HXB2	Mut	type	HIVdB comment
40_F	40	E	F	NRTI	E40F is a non-polymorphic accessory mutation selected by AZT and d4T. It usually occurs in combination with M41L, L210W and T215Y. In this context it is associated with reduced susceptibility to each of the NRTIs.
41_I	41	M	I	Other	M41I is usually an artifact resulting from APOBEC3G-mediated hypermutation.
41_L	41	M	L	NRTI	M41L is a TAM that usually occurs with T215Y. In combination, M41L plus T215Y confer intermediate / high-level resistance to AZT and d4T and contribute to reduced ddI, ABC and TDF susceptibility.
44_A	44	E	A	NRTI	E44D is a relatively non-polymorphic accessory mutation and E44A is a nonpolymorphic accessory mutation. Each usually occurs with multiple TAMs.
44_D	44	E	D	NRTI	E44D is a relatively non-polymorphic accessory mutation and E44A is a nonpolymorphic accessory mutation. Each usually occurs with multiple TAMs.
62_V	62	A	V	NRTI	A62V is an accessory mutation that often occurs in combination with the multi-NRTI resistance mutations K65R or Q151M. A62V is widespread in subtype A viruses in former Soviet Union countries but A62 is otherwise non-polymorphic.
65_N	65	K	N	NRTI	K65R causes intermediate/high-level resistance to TDF, ddI, ABC and d4T and low/intermediate resistance to 3TC and FTC. K65R increases susceptibility to AZT. K65N is a rare mutation with similar but less pronounced effects on NRTI susceptibility than K65R.
65_R	65	K	R	NRTI	K65R causes intermediate/high-level resistance to TDF, ddI, ABC and d4T and low/intermediate resistance to 3TC and FTC. K65R increases susceptibility to AZT.
65_E	65	K	E	NRTI	K65R causes intermediate/high-level resistance to TDF, ddI, ABC and d4T and low/intermediate resistance to 3TC and FTC. K65R increases susceptibility to AZT. K65E is an extremely rare NRTI-selected mutation with markedly reduced replication fitness.
67_del	67	D	del	NRTI	Amino acid deletions between codons 67 and 70 are rare and usually occur in combination with multiple TAMs, K65R, or the Q151M mutation complex. Deletions at position 67 are more often associated with multiple TAMs. Deletions at positions 69 and 70 are more often associated with K65R or the Q151M mutation complex.
67_N	67	D	N	NRTI	D67N is a non-polymorphic TAM associated with low-level resistance to AZT and d4T. When present with other TAMs, it contributes reduced susceptibility to ABC, ddI, and TDF.
67_H	67	D	H	NRTI	D67N is a non-polymorphic TAM associated with low-level resistance to AZT and d4T. When present with other TAMs, it contributes reduced susceptibility to ABC, ddI, and TDF. D67G/E/S/T/H are non-polymorphic NRTI-selected mutations that also generally occur in viruses with multiple TAMs.
67_G	67	D	G	NRTI	D67N is a non-polymorphic TAM associated with low-level resistance to AZT and d4T. When present with other TAMs, it contributes reduced susceptibility to ABC, ddI, and TDF. D67G/E/S/T/H are non-polymorphic NRTI-selected mutations that also generally occur in viruses with multiple TAMs.
67_E	67	D	E	NRTI	D67N is a non-polymorphic TAM associated with low-level resistance to AZT and d4T. When present with other TAMs, it contributes reduced susceptibility to ABC, ddI, and TDF. D67G/E/S/T/H are non-polymorphic NRTI-selected mutations that also generally occur in viruses with multiple TAMs.
67_S	67	D	S	NRTI	D67N is a non-polymorphic TAM associated with low-level resistance to AZT and d4T. When present with other TAMs, it contributes reduced susceptibility to ABC, ddI, and TDF. D67G/E/S/T/H are non-polymorphic NRTI-selected mutations that also generally occur in viruses with multiple TAMs.
67_T	67	D	T	NRTI	D67N is a non-polymorphic TAM associated with low-level resistance to AZT and d4T. When present with other TAMs, it contributes reduced susceptibility to ABC, ddI, and TDF. D67G/E/S/T/H are non-polymorphic NRTI-selected mutations that also generally occur in viruses with multiple TAMs.
68_del	68	S	del	NRTI	Amino acid deletions between codons 67 and 70 are rare and usually occur in combination with multiple TAMs, K65R, or the Q151M mutation complex. Deletions at position 67 are more often associated with multiple TAMs. Deletions at positions 69 and 70 are more often associated with K65R or the Q151M mutation complex. Deletions at codon 68 are extremely rare and less well characterized.
68_G	68	S	G	Other	S68G is a polymorphic mutation that is often selected in combination with K65R. It partially restores the replication defect associated with K65R.
69_A	69	T	A	Other	T69S/A/I/E are relatively polymorphic mutations weakly selected in patients receiving NRTIs. Their effects on NRTI susceptibility have not been well studied.
69_S	69	T	S	Other	T69S/A/I/E are relatively polymorphic mutations weakly selected in patients receiving NRTIs. Their effects on NRTI susceptibility have not been well studied.
69_N	69	T	N	Other	T69N is a relatively non-polymorphic mutation weakly selected in patients receiving NRTIs. In combination with TAMs, it may contribute minimally reduced susceptibility to ddI, d4T, and AZT.
69_E	69	T	E	Other	T69S/A/I/E are relatively polymorphic mutations weakly selected in patients receiving NRTIs. Their effects on NRTI susceptibility have not been well studied.
69_I	69	T	I	Other	T69S/A/I/E are relatively polymorphic mutations weakly selected in patients receiving NRTIs. Their effects on NRTI susceptibility have not been well studied.
69_ins	69	T	ins	NRTI	Amino acid insertions between codons 67 and 70 are by convention assigned to codon 69. Together with TAMs, they are associated with high-level resistance to AZT, d4T, ddI, ABC and TDF and intermediate to 3TC and FTC.
69_del	69	T	del	NRTI	Amino acid deletions between codons 67 and 70 are rare and usually occur in combination with multiple TAMs, K65R, or the Q151M mutation complex. Deletions at position 67 are more often associated with multiple TAMs. Deletions at positions 69 and 70 are more often associated with K65R or the Q151M mutation complex.
69_G	69	T	G	NRTI	T69G is a rare non-polymorphic mutation that usually occurs in viruses with a deletion at codon 67 and multiple other NRTI-resistance mutations.
69_D	69	T	D	NRTI	T69D is a non-polymorphic mutation that reduces susceptibility to ddI and possibly d4T.
70_S	70	K	S	NRTI	K70E/G cause low-level resistance to TDF, ABC, DDI and possibly 3TC and FTC. K70E/G increase susceptibility to AZT. K70Q/N/S/T are rare non-polymorphic NRTI-selected mutations that appear to have resistance profiles similar to K70E/G.
70_T	70	K	T	NRTI	K70E/G cause low-level resistance to TDF, ABC, DDI and possibly 3TC and FTC. K70E/G increase susceptibility to AZT. K70Q/N/S/T are rare non-polymorphic NRTI-selected mutations that appear to have resistance profiles similar to K70E/G.
70_del	70	K	del	NRTI	Amino acid deletions between codons 67 and 70 are rare and usually occur in combination with multiple TAMs, K65R, or the Q151M mutation complex. Deletions at position 67 are more often associated with multiple TAMs. Deletions at positions 69 and 70 are more often associated with K65R or the Q151M mutation complex.
70_Q	70	K	Q	NRTI	K70E/G cause low-level resistance to TDF, ABC, DDI and possibly 3TC and FTC. K70E/G increase susceptibility to AZT. K70Q/N/S/T are rare non-polymorphic NRTI-selected mutations that appear to have resistance profiles similar to K70E/G.
70_N	70	K	N	NRTI	K70E/G cause low-level resistance to TDF, ABC, DDI and possibly 3TC and FTC. K70E/G increase susceptibility to AZT. K70Q/N/S/T are rare non-polymorphic NRTI-selected mutations that appear to have resistance profiles similar to K70E/G.
70_E	70	K	E	NRTI	K70E/G cause low-level resistance to TDF, ABC, DDI and possibly 3TC and FTC. K70E/G increase susceptibility to AZT.
70_R	70	K	R	NRTI	K70R causes intermediate resistance to AZT and possibly low-level resistance to D4T, DDI, ABC and TDF.
70_G	70	K	G	NRTI	K70E/G cause low-level resistance to TDF, ABC, DDI and possibly 3TC and FTC. K70E/G increase susceptibility to AZT.
74_I	74	L	I	NRTI	L74V/I cause high-level resistance to ddI and intermediate resistance to ABC.
74_V	74	L	V	NRTI	L74V/I cause high-level resistance to ddI and intermediate resistance to ABC.
75_T	75	V	T	NRTI	V75T causes high-level d4T resistance and intermediate ddI resistance.
75_I	75	V	I	NRTI	V75I is a relatively non-polymorphic accessory mutation that often occurs in combination with the multi-NRTI resistance mutation Q151M. When V75I occurs alone its clinical significance is uncertain.
75_A	75	V	A	NRTI	V75S/A are non-polymorphic mutations that appear to reduce susceptibility to d4T and ddI.
75_S	75	V	S	NRTI	V75S/A are non-polymorphic mutations that appear to reduce susceptibility to d4T and ddI.
75_M	75	V	M	NRTI	V75M causes intermediate d4T resistance, low-level ddI resistance, and potentially low-level AZT resistance.
77_L	77	F	L	NRTI	F77L usually occurs in combination with the multi-NRTI resistance mutation Q151M. When it occurs alone, its clinical significance is uncertain.
90_I	90	V	I	Other	V90I is a polymorphic accessory mutation weakly selected by each of the NNRTIs. It has a weight of 1.0 in the Tibotec ETR genotypic susceptibility score but is associated with minimal, if any, detectable reduction in NNRTI susceptibility.
98_G	98	A	G	NNRTI	A98G is a non-polymorphic accessory mutation associated with low-level reduced susceptibility to each of the NNRTIs.
100_V	100	L	V	NNRTI	L100I is a non-polymorphic mutation that usually occurs with K103N. In this setting it causes high-level resistance to NVP, EFV, and RPV and intermediate resistance to ETR. L100V is a rare non-polymorphic mutation with low / intermediate resistance to EFV, NVP, and RPV.
100_I	100	L	I	NNRTI	L100I is a non-polymorphic mutation that usually occurs in combination with K103N. In this setting it causes high-level resistance to NVP, EFV, and RPV and intermediate resistance to ETR. It has a weight of 2.5 in the Tibotec ETR genotypic susceptibility score. Preliminary data suggests it is contributes low to intermediate reductions in DOR susceptibility when it occurs in combination with K103N.
101_H	101	K	H	NNRTI	K101H is a non-polymorphic accessory mutation selected by NVP, EFV and ETR. When present with other NNRTI-resistance mutations, K101H further reduces susceptibility to these NNRTIs. It has a weight of 1.0 in the Tibotec ETR genotypic susceptibility score. Its effect on DOR susceptibility is not known.
101_E	101	K	E	NNRTI	K101E is a non-polymorphic primarily accessory mutation that causes intermediate resistance to NVP and RPV, low-level resistance to EFV, and potentially low-level resistance to ETR. It has a weight of 1.0 in the Tibotec ETR genotypic susceptibility score. It is associated with low-level reductions in DOR susceptibility.
101_Q	101	K	Q	Other	K101Q is a relatively non-polymorphic mutation that is weakly selected in patients receiving NVP and EFV. It is of uncertain phenotypic and clinical significance.
101_T	101	K	T	Other	K101N/A/T are uncommon non-polymorphic NNRTI-selected mutation of uncertain phenotypic and clinical significance.
101_N	101	K	N	Other	K101N/A/T are uncommon non-polymorphic NNRTI-selected mutation of uncertain phenotypic and clinical significance.
101_A	101	K	A	Other	K101N/A/T are uncommon non-polymorphic NNRTI-selected mutation of uncertain phenotypic and clinical significance.
101_P	101	K	P	NNRTI	K101P is a non-polymorphic mutation that causes high-level resistance to each of the NNRTIs. It has a weight of 2.5 in the Tibotec ETR genotypic susceptibility score. Its does not appear to reduce DOR susceptibility.
103_T	103	K	T	NNRTI	K103T is an extremely rare non-polymorphic mutation that appears to cause intermediate/high-level resistance to NVP. It has little if any effect on EFV susceptibility.
103_S	103	K	S	NNRTI	K103S is a non-polymorphic mutation that causes high-level reductions in NVP susceptibility but intermediate reductions in EFV susceptibility. Because K103S is a 2-bp change from the wildtype K and a 1-bp change from K103N, persons with K103S may be likely to have once had K103N.
103_N	103	K	N	NNRTI	K103N is a non-polymorphic mutation that causes high-level reductions in NVP and EFV susceptibility.
103_R	103	K	R	Other	K103R is a polymorphic mutation that alone has no effect on NNRTI susceptibility. However, in combination with V179D, it reduces NVP and EFV susceptibility about 15-fold.
103_Q	103	K	Q	NNRTI	K103E/Q are rare mutations that have not been associated with reduced NNRTI susceptibility.
103_E	103	K	E	NNRTI	K103E/Q are rare mutations that have not been associated with reduced NNRTI susceptibility.
103_H	103	K	H	NNRTI	K103H is a rare non-polymorphic mutation that causes high-level resistance to NVP and EFV.
106_I	106	V	I	NNRTI	V106I is occurs in 1% to 2% of viruses from untreated persons. It contributes to reduced NNRTI susceptibility in combination with other mutations. It has a weight of 1.5 in the Tibotec ETR genotypic susceptibility score despite not contributing much to reduced ETR susceptibility. It likely plays a greater role in reducing DOR susceptibility, particularly in combination with other NNRTI-associated…
106_A	106	V	A	NNRTI	V106A is a non-polymorphic mutation that causes high-level resistance to NVP and intermediate resistance to EFV. It is selected in vitro and in vivo by DOR and alone it causes intermediate reductions in DOR susceptibility. In combination with other DOR-associated DRMs it is associated with high-level DOR resistance.
106_M	106	V	M	NNRTI	V106M is a non-polymorphic mutation that causes high-level resistance to NVP and EFV. It is selected in vitro and in vivo by DOR and preliminary data suggests it is associated with low/intermediate reductions in DOR susceptibility.
108_I	108	V	I	NNRTI	V108I is a relatively non-polymorphic accessory mutation selected in vitro and/or in vivo with each of the NNRTIs. It causes low-level reductions in susceptibility to NVP and DOR. Alone, it does not appear to reduce susceptibility to EFV, ETR, or RPV.
115_F	115	Y	F	NRTI	Y115F causes intermediate resistance to ABC and low-level resistance to TDF.
116_Y	116	F	Y	NRTI	F116Y usually occurs in combination with the multi-NRTI resistance mutation Q151M.
118_I	118	V	I	Other	V118I is a polymorphic accessory NRTI-resistance mutation that often occurs in combination with multiple TAMs.
132_L	132	I	L	Other	I132M is an extremely rare non-polymorphic mutation associated with uncertain amount of reduced NVP and EFV susceptibility. I132L is a more common, non-polymorphic NNRTI-selected mutation that has not been well studied.
132_M	132	I	M	Other	I132M is an extremely rare non-polymorphic mutation associated with uncertain amount of reduced NVP and EFV susceptibility. I132L is a more common, non-polymorphic NNRTI-selected mutation that has not been well studied.
138_G	138	E	G	NNRTI	E138Q/G are non-polymorphic accessory mutations frequently selected in patients receiving ETR and RPV and occasionally in patients receiving NVP and EFV. In most studies, they cause low-level reductions in susceptibility to NVP, RPV, and ETR.
138_K	138	E	K	NNRTI	E138K is a non-polymorphic mutation selected in a high proportion of patients receiving RPV. It reduces RPV susceptibility by 2 to 3-fold and in combination with K101E or the NRTI-resistance mutation M184I, it is sufficient to cause virological failure on a first-line RPV-containing regimen. E138K causes low-level cross-resistance to ETR but no cross-resistance to NVP, EFV, or DOR.
138_Q	138	E	Q	NNRTI	E138Q/G are non-polymorphic accessory mutations frequently selected in patients receiving ETR and RPV and occasionally in patients receiving NVP and EFV. In most studies, they cause low-level reductions in susceptibility to NVP, RPV, and ETR.
138_A	138	E	A	NNRTI	E138A is a common polymorphic accessory mutation weakly selected in patients receiving ETR and RPV. It reduces ETR and RPV susceptibility ~2-fold. It has a weight of 1.5 in the Tibotec ETR genotypic susceptibility score.
138_R	138	E	R	NNRTI	E138R is a rare non-polymorphic accessory mutation selected in vitro by RPV. It is associated with 2 to 3-fold reduced susceptibility to ETR and RPV.
151_M	151	Q	M	NRTI	Q151M causes intermediate/high-level resistance to AZT, ddI, d4T and ABC and low-level resistance to TDF, 3TC and FTC. In combination with accessory mutations at positions 62, 75, 77, and 116, Q151M confers high-level resistance to AZT, ddI, d4T and ABC and intermediate resistance to TDF, 3TC and FTC.
151_L	151	Q	L	NRTI	Q151M causes intermediate/high-level resistance to AZT, ddI, d4T and ABC and low-level resistance to TDF, 3TC and FTC. In combination with accessory mutations at positions 62, 75, 77, and 116, Q151M confers high-level resistance to AZT, ddI, d4T and ABC and intermediate resistance to TDF, 3TC and FTC. Q151L is an extremely rare transitional mutation that may precede the emergence of the Q151M.
179_D	179	V	D	NNRTI	V179D is a polymorphic accessory NNRTI-selected mutation. It contributes low-levels reductions in susceptibility to each of the NNRTIs. The combination of V179D and K103R act synergistically to reduce NVP and EFV susceptibility. V179D has a weight of 1.0 in the Tibotec ETR genotypic susceptibility score. V179E is a non-polymorphic mutation occasionally selected by NVP and EFV. V179E appears simil…
179_E	179	V	E	NNRTI	V179D is a polymorphic accessory NNRTI-selected mutation. It contributes low-levels reductions in susceptibility to each of the NNRTIs. The combination of V179D and K103R act synergistically to reduce NVP and EFV susceptibility. V179D has a weight of 1.0 in the Tibotec ETR genotypic susceptibility score. V179E is a non-polymorphic mutation occasionally selected by NVP and EFV. V179E appears simil…
179_F	179	V	F	NNRTI	V179F is a non-polymorphic mutation frequently selected in patients receiving ETR. It nearly always occurs in combination with Y181C. Alone V179F has little effect on NNRTI susceptibility. In combination with Y181C, however, it is associated with high-level ETR and RPV resistance. It has a weight of 1.5 in the Tibotec ETR genotypic susceptibility score.
179_L	179	V	L	NNRTI	V179L is a rare non-polymorphic mutation occasionally selected in patients receiving NNRTIs. Its effects on NNRTI susceptibility have not been well studied. It is listed as an RPV-associated resistance mutation in the RPV package-insert.
179_T	179	V	T	NNRTI	V179T is a relatively rare non-polymorphic mutation occasionally selected in patients receiving NNRTIs. It is associated with minimal, if any, reduction in ETR and RPV susceptibility. It has a weight of 1.0 in the Tibotec ETR genotypic susceptibility score.
179_I	179	V	I	Other	V179I is a polymorphic mutation that is frequently selected in patients receiving ETR and RPV. But It has little, if any, direct effect on NNRTI susceptibility.
181_F	181	Y	F	NNRTI	Y181F/S/G are rare non-polymorphic NNRTI-associated mutations that are usually present as part of an electrophoretic mixture. They are likely to represent transitional mutations between Y and I or V.
181_S	181	Y	S	NNRTI	Y181F/S/G are rare non-polymorphic NNRTI-associated mutations that are usually present as part of an electrophoretic mixture. They are likely to represent transitional mutations between Y and I or V.
181_I	181	Y	I	NNRTI	Y181I/V are 2-base pair non-polymorphic mutations selected by NVP and ETR. They cause high-level resistance to NVP, ETR, and RPV. They each have a weight of 3.0 in the Tibotec ETR genotypic susceptibility score. Their effects on DOR have not been well-characterized.
181_G	181	Y	G	NNRTI	Y181F/S/G are rare non-polymorphic NNRTI-associated mutations that are usually present as part of an electrophoretic mixture. They are likely to represent transitional mutations between Y and I or V.
181_C	181	Y	C	NNRTI	Y181C is a non-polymorphic mutation selected in patients receiving NVP, ETR and RPV. It reduces susceptibility to NVP, ETR, RPV, and EFV by >50-fold, 5-fold, 3-fold, and 2-fold, respectively. Although Y181C itself reduces EFV susceptibility by only 2-fold, it has been associated with a reduced response to an EFV-containing regimen in NNRTI-experienced patients. Y181C has a weight of 2.5 in the Ti…
181_V	181	Y	V	NNRTI	Y181I/V are 2-base pair non-polymorphic mutations selected by NVP and ETR. They cause high-level resistance to NVP, ETR, and RPV. They each have a weight of 3.0 in the Tibotec ETR genotypic susceptibility score. Their effects on DOR have not been well-characterized.
184_I	184	M	I	NRTI	M184V/I cause high-level in vitro resistance to 3TC and FTC and low-level resistance to ddI and ABC. However, M184V/I are not contraindications to continued treatment with 3TC or FTC because they increase susceptibility to AZT, TDF and d4T and are associated with clinically significant reductions in HIV-1 replication.
184_V	184	M	V	NRTI	M184V/I cause high-level in vitro resistance to 3TC and FTC and low-level resistance to ddI and ABC. However, M184V/I are not contraindications to continued treatment with 3TC or FTC because they increase susceptibility to AZT, TDF and d4T and are associated with clinically significant reductions in HIV-1 replication.
188_C	188	Y	C	NNRTI	Y188C is a non-polymorphic mutation selected in patients receiving NVP and EFV. It confers high-level resistance to NVP and EFV.
188_F	188	Y	F	NNRTI	Y188F is a rare non-polymorphic NNRTI-associated mutation that is usually present as part of an electrophoretic mixture. It appears to represent a transitional mutation between Y and L.
188_H	188	Y	H	NNRTI	Y188H is a non-polymorphic mutation selected in patients receiving NVP and EFV. It causes about 5 to 10-fold reduced susceptibility to NVP and EFV.
188_L	188	Y	L	NNRTI	Y188L is a non-polymorphic mutation that causes high-level resistance to NVP, EFV, RPV, and DOR, and potentially low-level resistance to ETR.
190_R	190	G	R	Other	G190R is strongly suspicious for being an artifact of APOBEC-mediated G-to-A hypermutation. It has not been associated with reduced NNRTI susceptibility.
190_V	190	G	V	NNRTI	G190C/T/V are rare non-polymorphic mutations that cause high-level resistance to NVP and EFV. Their effects on ETR, RPV, and DOR susceptibility are not known.
190_A	190	G	A	NNRTI	G190A is a non-polymorphic mutation that causes high-level resistance to NVP and intermediate resistance to EFV. It has a weight of 1.0 in the Tibotec ETR genotypic susceptibility score but does not appear to be selected by ETR or RPV or to reduce their in vitro susceptibility in the absence of other NNRTI-resistance mutations. It also does not appear to reduce DOR susceptibility.
190_C	190	G	C	NNRTI	G190C/T/V are rare non-polymorphic mutations that cause high-level resistance to NVP and EFV. Their effects on ETR, RPV, and DOR susceptibility are not known.
190_T	190	G	T	NNRTI	G190C/T/V are rare non-polymorphic mutations that cause high-level resistance to NVP and EFV. Their effects on ETR, RPV, and DOR susceptibility are not known.
190_S	190	G	S	NNRTI	G190S is a non-polymorphic mutation that causes high-level resistance to NVP and EFV. It has a weight of 1.5 in the Tibotec ETR genotypic susceptibility score but does not appear to be selected by ETR or RPV or to reduce their in vitro susceptibility in the absence of other NNRTI-resistance mutations. Preliminary data suggests it is associated with low/intermediate reductions in DOR susceptibilit…
190_Q	190	G	Q	NNRTI	G190E is a non-polymorphic mutation that causes high-level resistance to each of the NNRTIs including DOR. G190Q is a less common non-polymorphic NNRTI-selected mutation that is associated with high-level NVP and EFV resistance. Its effects on RPV, ETR, and DOR susceptibility is not known.
190_E	190	G	E	NNRTI	G190E is a non-polymorphic mutation that causes high-level resistance to each of the NNRTIs including DOR. G190Q is a less common non-polymorphic NNRTI-selected mutation that is associated with high-level NVP and EFV resistance. Its effects on RPV, ETR, and DOR susceptibility is not known.
210_W	210	L	W	NRTI	L210W is a TAM that usually occurs in combination with M41L and T215Y. The combination of M41, L210W and T215Y causes high-level resistance to AZT and d4T and intermediate to high-level resistance to ddI, ABC and TDF.
215_I	215	T	I	NRTI	T215Y/F cause intermediate/high-level resistance to AZT and d4T, low-level resistance to ddI, and potentially low-level resistance to ABC and TDF. T215S/C/D/E/I/V/N/A/L do not reduce NRTI susceptibility but arise from viruses that once contained T215Y/F. The presence of one of these revertant mutations suggests that the patient may have once had a majority virus population with T215Y/F.
215_D	215	T	D	NRTI	T215Y/F cause intermediate/high-level resistance to AZT and d4T, low-level resistance to ddI, and potentially low-level resistance to ABC and TDF. T215S/C/D/E/I/V/N/A/L do not reduce NRTI susceptibility but arise from viruses that once contained T215Y/F. The presence of one of these revertant mutations suggests that the patient may have once had a majority virus population with T215Y/F.
215_E	215	T	E	NRTI	T215Y/F cause intermediate/high-level resistance to AZT and d4T, low-level resistance to ddI, and potentially low-level resistance to ABC and TDF. T215S/C/D/E/I/V/N/A/L do not reduce NRTI susceptibility but arise from viruses that once contained T215Y/F. The presence of one of these revertant mutations suggests that the patient may have once had a majority virus population with T215Y/F.
215_F	215	T	F	NRTI	T215F is a TAM that causes intermediate/high-level resistance to AZT and d4T, low-level resistance to ddI, and potentially low-level resistance to ABC and TDF.
215_A	215	T	A	NRTI	T215Y/F cause intermediate/high-level resistance to AZT and d4T, low-level resistance to ddI, and potentially low-level resistance to ABC and TDF. T215S/C/D/E/I/V/N/A/L do not reduce NRTI susceptibility but arise from viruses that once contained T215Y/F. The presence of one of these revertant mutations suggests that the patient may have once had a majority virus population with T215Y/F.
215_L	215	T	L	NRTI	T215Y/F cause intermediate/high-level resistance to AZT and d4T, low-level resistance to ddI, and potentially low-level resistance to ABC and TDF. T215S/C/D/E/I/V/N/A/L do not reduce NRTI susceptibility but arise from viruses that once contained T215Y/F. The presence of one of these revertant mutations suggests that the patient may have once had a majority virus population with T215Y/F.
215_Y	215	T	Y	NRTI	T215Y is a TAM that causes intermediate/high-level resistance to AZT and d4T, low-level resistance to ddI, and potentially low-level resistance to ABC and TDF.
215_S	215	T	S	NRTI	T215Y/F cause intermediate/high-level resistance to AZT and d4T, low-level resistance to ddI, and potentially low-level resistance to ABC and TDF. T215S/C/D/E/I/V/N/A/L do not reduce NRTI susceptibility but arise from viruses that once contained T215Y/F. The presence of one of these revertant mutations suggests that the patient may have once had a majority virus population with T215Y/F.
215_V	215	T	V	NRTI	T215Y/F cause intermediate/high-level resistance to AZT and d4T, low-level resistance to ddI, and potentially low-level resistance to ABC and TDF. T215S/C/D/E/I/V/N/A/L do not reduce NRTI susceptibility but arise from viruses that once contained T215Y/F. The presence of one of these revertant mutations suggests that the patient may have once had a majority virus population with T215Y/F.
215_N	215	T	N	NRTI	T215Y/F cause intermediate/high-level resistance to AZT and d4T, low-level resistance to ddI, and potentially low-level resistance to ABC and TDF. T215S/C/D/E/I/V/N/A/L do not reduce NRTI susceptibility but arise from viruses that once contained T215Y/F. The presence of one of these revertant mutations suggests that the patient may have once had a majority virus population with T215Y/F.
215_C	215	T	C	NRTI	T215Y/F cause intermediate/high-level resistance to AZT and d4T, low-level resistance to ddI, and potentially low-level resistance to ABC and TDF. T215S/C/D/E/I/V/N/A/L do not reduce NRTI susceptibility but arise from viruses that once contained T215Y/F. The presence of one of these revertant mutations suggests that the patient may have once had a majority virus population with T215Y/F.
219_N	219	K	N	NRTI	K219N/R are accessory TAMS that usually occur in combination with multiple other TAMs.
219_Q	219	K	Q	NRTI	K219Q/E are accessory TAMS associated with reduced susceptibility to AZT and possibly d4T.
219_R	219	K	R	NRTI	K219N/R are accessory TAMS that usually occur in combination with multiple other TAMs.
219_E	219	K	E	NRTI	K219Q/E are accessory TAMS associated with reduced susceptibility to AZT and possibly d4T.
219_W	219	K	W	NRTI	K219W is an uncommon NRTI-selected mutation.
221_Y	221	H	Y	NNRTI	H221Y is a non-polymorphic accessory mutation selected primarily by NVP and RPV. It frequently occurs in combination with Y181C.
225_H	225	P	H	NNRTI	P225H is a non-polymorphic EFV-selected mutation that usually occurs in combination with K103N. The combination of P225H and K103N synergistically reduces NVP, EFV and DOR susceptibility.
227_I	227	F	I	NNRTI	F227L is a non-polymorphic mutation that usually occurs in combination with V106A. It is selected in vivo and in vitro with both NVP and DOR. In this context it is associated with high-level reductions in NVP and DOR susceptibility and intermediate reductions in EFV susceptibility. F227I/V are extremely rare mutations that have been selected in vitro by DOR.
227_V	227	F	V	NNRTI	F227L is a non-polymorphic mutation that usually occurs in combination with V106A. It is selected in vivo and in vitro with both NVP and DOR. In this context it is associated with high-level reductions in NVP and DOR susceptibility and intermediate reductions in EFV susceptibility. F227I/V are extremely rare mutations that have been selected in vitro by DOR.
227_L	227	F	L	NNRTI	F227L is a non-polymorphic mutation that usually occurs in combination with V106A. It is selected in vivo and in vitro with both NVP and DOR. In this context it is associated with high-level reductions in NVP and DOR susceptibility and intermediate reductions in EFV susceptibility. F227I/V are extremely rare mutations that have been selected in vitro by DOR.
227_C	227	F	C	NNRTI	F227C is a nonpolymorphic mutation selected in persons receiving DOR and rarely in persons receiving ETR and RPV. It usually occurs in combination with other DRMs and in this setting has consistently been associated with the highest possible levels of DOR resistance. It is also usually associated with intermediate or higher reductions in susceptibility to NVP, EFV, ETR, and RPV.
230_I	230	M	I	NNRTI	M230I is an extremely rare mutation selected by RPV. Its effects on NNRTI susceptibility have not been well studied. It also often occurs as a result of APOBEC-mediated G-to-A hypermutation resulting in viruses that are likely to be noninfectious.
230_L	230	M	L	NNRTI	M230L is an uncommon non-polymorphic mutation selected in persons receiving EFV, NVP, and RPV. It causes intermediate to high-level resistance to each of the NNRTIs.
234_I	234	L	I	NNRTI	L234I is a nonpolymorphic mutation selected in persons receiving NVP and EFV. It is also selected in vitro by ETR and DOR. In combination with V106A, it is associated with high-level DOR resistance. Its effect on susceptibility when it occurs alone has not been studied.
236_L	236	P	L	NNRTI	P236L is a non-polymorphic mutation that causes high-level DLV resistance but does not reduce susceptibility to any other NNRTIs.
238_T	238	K	T	NNRTI	K238T is a non-polymorphic mutation selected in patients receiving NVP and EFV. It usually occurs in combination with K103N. It reduces susceptibility to NVP and EFV by about 5-fold. It may also reduce susceptibility to ETR and RPV. K238N is a non-polymorphic accessory mutation that is also selected by NVP and EFV. It appears to have minimal, if any, effects on NNRTI susceptibility.
238_N	238	K	N	NNRTI	K238T is a non-polymorphic mutation selected in patients receiving NVP and EFV. It usually occurs in combination with K103N. It reduces susceptibility to NVP and EFV by about 5-fold. It may also reduce susceptibility to ETR and RPV. K238N is a non-polymorphic accessory mutation that is also selected by NVP and EFV. It appears to have minimal, if any, effects on NNRTI susceptibility.
238_R	238	K	R	Other	K238R is a common polymorphism that does not reduce NNRTI susceptibility.
318_F	318	Y	F	NNRTI	Y318F is an uncommon mutation that causes intermediate NVP resistance and potentially low-level EFV resistance. It has been selected in vivo by DOR but its effect on DOR susceptibility has not been studied.
348_I	348	N	I	NNRTI	N348I is a non-polymorphic accessory mutation selected by NVP and EFV and the NRTIs AZT and D4T. Alone it reduces AZT and NVP susceptibility by about 3-fold and EFV susceptibility by 2-fold.
